# Supplementary material
Source: PubMed Central journal article supplement (PMC3963576)
Supplement: supp_tpc.113.118943_tpc118943Supplemental.pdf [file supp_tpc.113.118943_tpc118943Supplemental.pdf]

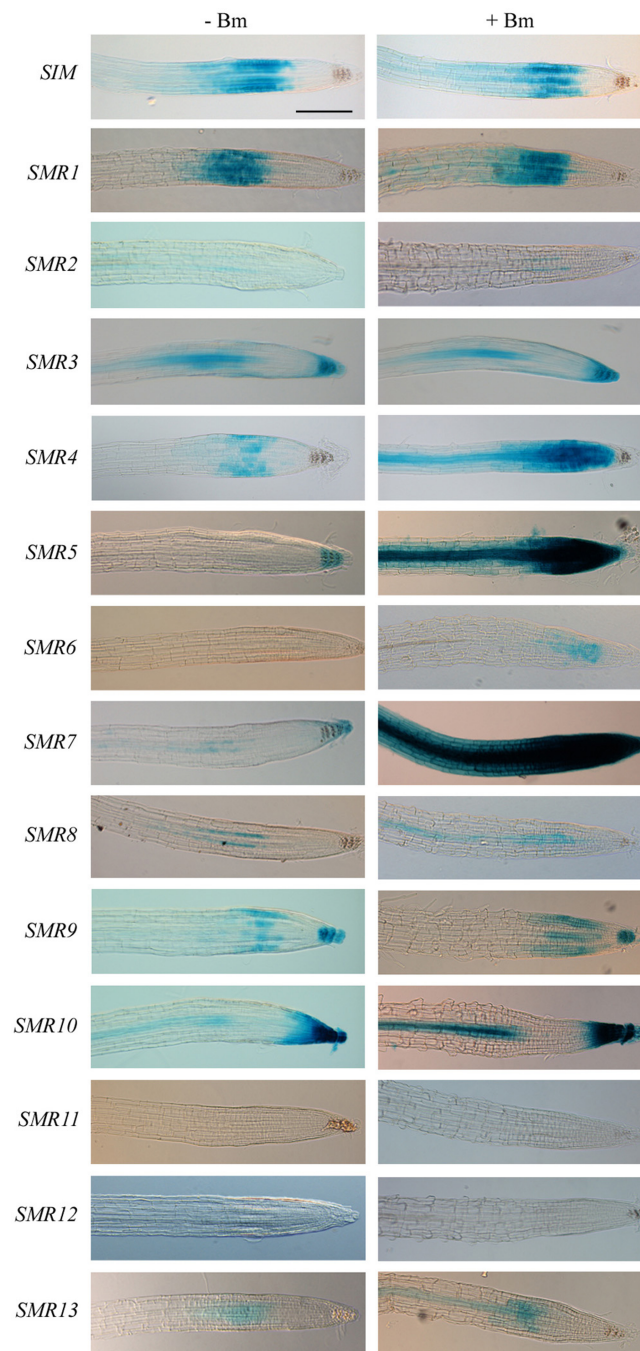

**Supplemental Figure 1.** *SIM/SMR* induction in response to bleomycin. One-week-old *SMR* reporter seedlings (names indicated on the left) were transferred to control (-Bm) medium or medium supplemented with 0.3  $\mu\text{g}/\text{mL}$  bleomycin (+Bm). GUS assays were performed 24 h after transfer. Scale bar = 200  $\mu\text{m}$ . All pictures at same magnification.

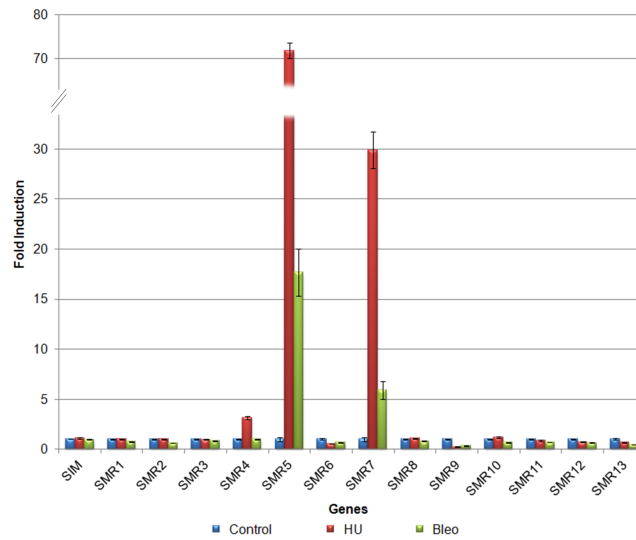

**Supplemental Figure 2.** Transcriptional induction of *SIM/SMR* genes upon HU and bleomycin treatment. One-week-old wild-type *Arabidopsis* seedlings were transferred to control medium (blue), or medium supplemented with 1 mM HU (red) or 0.3  $\mu\text{g}/\text{mL}$  bleomycin (green). Root tips were harvested after 24 h for qRT-PCR analysis. Expression levels in the control condition were arbitrarily set to one. Data represent mean  $\pm$  SE ( $n = 3$ ).

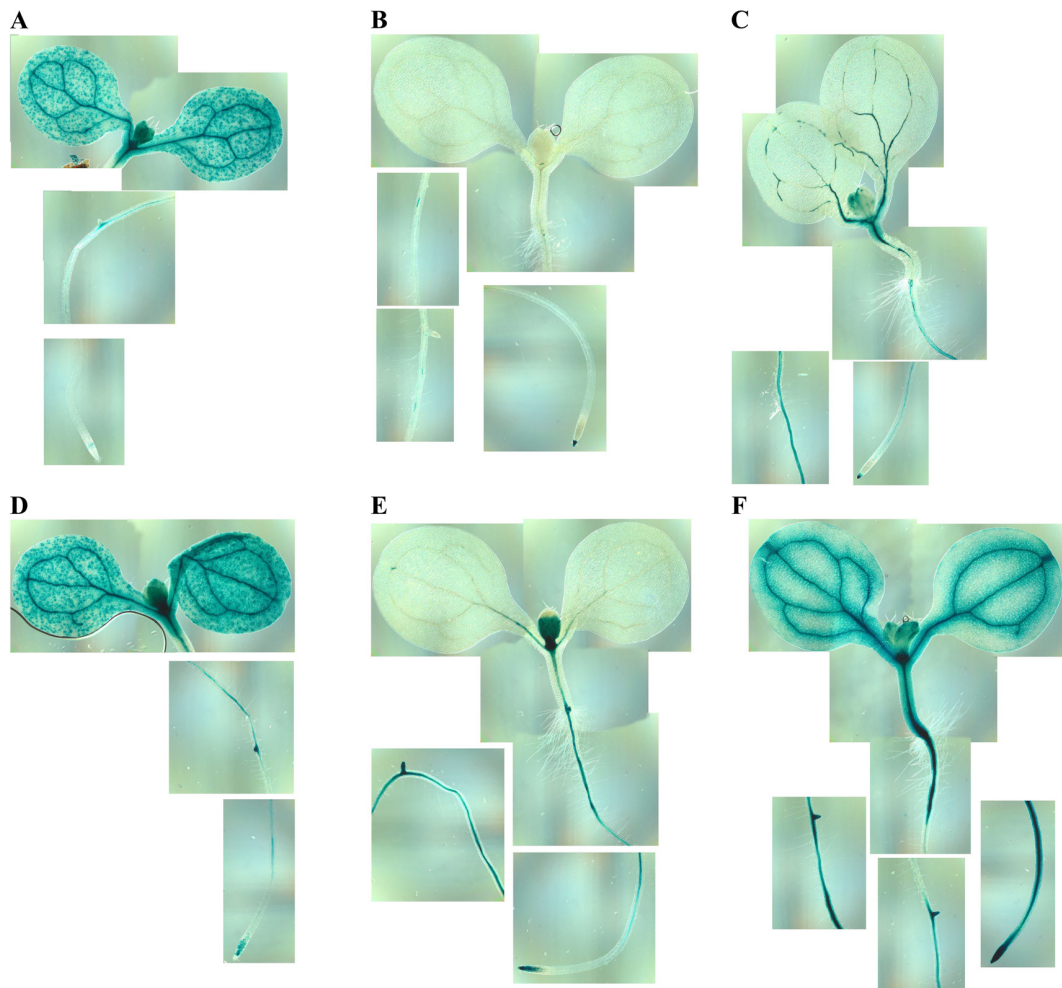

**Supplemental Figure 3.** Transcriptional induction of *SIM/SMR* genes upon  $\gamma$ -irradiation. (A-F) *PSMR4:GUS* (A and D), *PSMR5:GUS* (B and E) and *PSMR7:GUS* (C and D) either control-treated (A-C) or irradiated with 20 Gy of  $\gamma$ -rays (D-F). GUS assays were performed 1.5 h after irradiation.

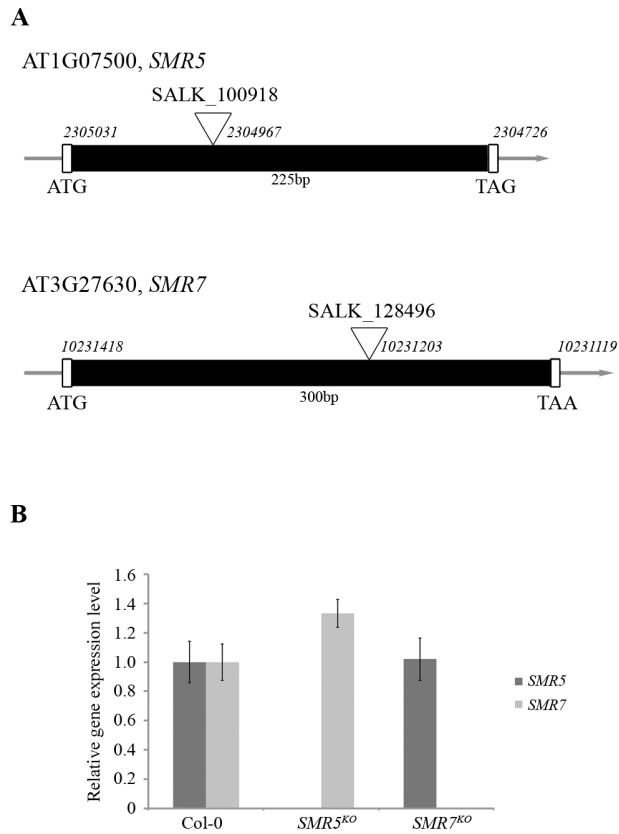

**Supplemental Figure 4.** Graphical representation of the *SMR5* and *SMR7* T-DNA insertion lines. **(A)**, Intron-exon organization of the *Arabidopsis SMR5* and *SMR7* genes. Black and white boxes represent coding and non-coding regions, respectively. The white triangles indicate the T-DNA insertion sites. **(B)**, qRT-PCR analysis of wild-type, *SMR5*<sup>KO</sup>, and *SMR7*<sup>KO</sup> seedlings using primers specific to either *SMR5* (dark grey) or *SMR7* (light grey). Expression levels in the wild type were arbitrarily set to one. Data represent mean  $\pm$  SE (n = 3).

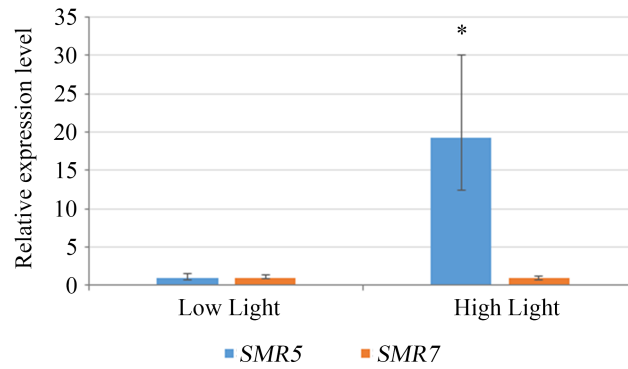

**Supplemental Figure 5.** *SMR5* and *SMR7* expression levels in response to high light treatment. One-week old wild type Col-0 plants were either control treated or exposed for 48 h to high light. Complete seedlings were harvested for RT-PCR analysis. Data represent mean  $\pm$  SE (n = 3), \*, P-value < 0.01 (two-tailed Student's *t*-test).

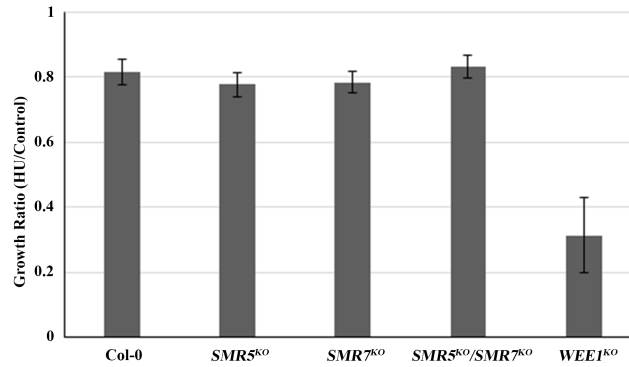

**Supplemental Figure 6.** Relative root growth of *SMR5<sup>KO</sup>*, *SMR7<sup>KO</sup>*, and *SMR5<sup>KO</sup> SMR7<sup>KO</sup>* plants upon HU treatment. Five-day-old seedlings were transferred to control medium or medium supplemented with 1 mM HU. Data plot the root growth ratio on HU versus control plates over 4 days after transfer. HU-hypersensitive *WEE1<sup>KO</sup>* plants were included as a positive control. Data represent mean  $\pm$  SE ( $n > 15$ ).

**Table S1: Annotated Arabidopsis *SIM*/*SMR* genes**

| <b>AGI locus</b> | <b>Annotation</b> |
|------------------|-------------------|
| At5g04470        | SIM               |
| At3g10525        | SMR1              |
| At1g08180        | SMR2              |
| At5g02420        | SMR3              |
| At5g02220        | SMR4              |
| At1g07500        | SMR5              |
| At5g40460        | SMR6              |
| At3g27630        | SMR7              |
| At1g10690        | SMR8              |
| At1g51355        | SMR9              |
| At2g28870        | SMR10             |
| At2g28330        | SMR11             |
| At2g37610        | SMR12             |
| At5g59360        | SMR13             |

**Table S2: DNA ploidy level distribution in transgenic plants overexpressing *SMR4*, *SMR5*, or *SMR7***

| Ploidy (%) | Col-0      | <i>SMR4</i> <sup>OE</sup> | <i>SMR5</i> <sup>OE</sup> | <i>SMR7</i> <sup>OE</sup> |
|------------|------------|---------------------------|---------------------------|---------------------------|
| 2C         | 19.6 ± 0.2 | 17.1 ± 0.1                | 23.6 ± 0.9                | 24.2 ± 1.3                |
| 4C         | 26.3 ± 1.2 | 19.4 ± 0.5                | 21.3 ± 0.8                | 29.2 ± 0.7                |
| 8C         | 49.2 ± 0.5 | 34.9 ± 3.4                | 34.8 ± 0.5                | 36.1 ± 0.2                |
| 16C        | 4.6 ± 0.7  | 27.1 ± 3.1                | 19.6 ± 0.2                | 9.5 ± 0.9                 |
| 32C        | 0.2 ± 0    | 1.5 ± 0.6                 | 0.7 ± 0.1                 | 1.1 ± 0.1                 |



**Table S3: List of primers used for cloning, genotyping, and RT-PCR****Promoter cloning primers**

|                |     |                                             |
|----------------|-----|---------------------------------------------|
| <i>SIAMESE</i> | Fw  | ATAGAAAAGTTGGTATTGTAATTATATATGAAAAAATAGTAAT |
|                | Rev | GTACAAACTTGTTCTTTTTTGTATATAAATATTAATGT      |
| <i>SMR1</i>    | Fw  | ATAGAAAAGTTGTCACAAGTGCATTTTTAATTTGTAGGA     |
|                | Rev | GTACAAACTTGCATCTAACTTGTGTATGTTTTGTTTTTGG    |
| <i>SMR2</i>    | Fw  | ATAGAAAAGTTGGTAACTCCTTCGGCATCTTTGT          |
|                | Rev | GTACAAACTTGTGGTCACATGGATGTGAAAGTTT          |
| <i>SMR3</i>    | Fw  | ATAGAAAAGTTGGTATTTTAAATTACGATTTCAAATCTTGA   |
|                | Rev | GTACAAACTTGTTAGACAAGTTTTACAGAGAGAAAGAAGAG   |
| <i>SMR4</i>    | Fw  | ATAGAAAAGTTGGTGAAACACAAAGCATCTTCG           |
|                | Rev | GTACAAACTTGTTCTTCTCTCTCGAACTCG              |
| <i>SMR5</i>    | Fw  | ATAGAAAAGTTGGTCAGAACGAACAAAAG               |
|                | Rev | GTACAAACTTGTTTTGTCCGCTCTCTCG                |
| <i>SMR6</i>    | Fw  | ATAGAAAAGTTGGTCAGTGTGTCAAACCGACG            |
|                | Rev | GTACAAACTTGTCTCTCTTAACTAACTCAAACCAAGA       |
| <i>SMR7</i>    | Fw  | AGAAAAGTTGCGTTGACGCGGGAAAATTAA              |
|                | Rev | GTACAAACTTGCTTAAACAGTTGGAGATTGAG            |
| <i>SMR8</i>    | Fw  | ATAGAAAAGTTGGTAGATCCCACACTTAAGAAATTGG       |
|                | Rev | GTACAAACTTGTGACTTCTCTCGAATGTGAATGAAGA       |
| <i>SMR9</i>    | Fw  | ATAGAAAAGTTGGTACATATAAAGGTGTATACACACCCTT    |
|                | Rev | GTACAAACTTGTTTTGAGACCAGAATAAGAGAGAAG        |
| <i>SMR10</i>   | Fw  | ATAGAAAAGTTGGTTTTAAAAAACCCTTCAAACCTAGTGC    |
|                | Rev | GTACAAACTTGTCTTTGAGAAGAAACGTCGCTC           |
| <i>SMR11</i>   | Fw  | ATAGAAAAGTTGGTTGTGGTAATCTACATGGAATTTGC      |
|                | Rev | GTACAAACTTGTTTGGATTCACGAGATCTAAGCA          |
| <i>SMR12</i>   | Fw  | ATAGAAAAGTTGGTTCGGCTCACCTTGTTTTCC           |
|                | Rev | GTACAAACTTGTGTGCGCTTTTTTTTCTTCTCAG          |
| <i>SMR13</i>   | Fw  | ATAGAAAAGTTGGTAAACTCAAGACACTTCTTTTTTGG      |
|                | Rev | GTACAAACTTGTCTTATCACAAACAGGAAAAGAGAGAGT     |

**ORF cloning primers**

|             |                 |                                       |
|-------------|-----------------|---------------------------------------|
| <i>SMR4</i> | Fw              | AAAAAGCAGGCTTCATGGAGGTGG TGGAGAGGAA G |
|             | Rev + stop code | AGAAAGCTGGGTCCTAAGCGCAAGCTTCTCTTC     |
|             | Rev - stop code | AGAAAGCTGGGTCAGCGCAAGCTTCTCTTC        |
| <i>SMR5</i> | Fw              | AAAAAGCAGGCTTCATGGAGGAGAAAACTACGACG   |
|             | Rev + stop code | AGAAAGCTGGGTCCTAGGTTGCCGCTTGGG        |
|             | Rev - stop code | AGAAAGCTGGGTCGGTTGCCGCTTGGGA          |
| <i>SMR7</i> | Fw              | AAAAAGCAGGCTTCATGGGAATTCGAAAAAATCTC   |
|             | Rev + stop code | AGAAAGCTGGGTCCTAACGGCGTTGTATAAACACC   |
|             | Rev - stop code | AGAAAGCTGGGTCACGGCGTTGTATAAACACCA     |

**T-DNA genotyping primers**

|             |             |    |                          |
|-------------|-------------|----|--------------------------|
| <i>SMR5</i> | SALK_100918 | LB | GAACGAACAAAAGTGAGCTCG    |
|             |             | RB | TTTCCCAACCTGACAGAAAAC    |
| <i>SMR7</i> | SALK_128496 | LB | AAAATCGATAACTAAAACGAACCG |
|             |             | RB |                          |

**RT-PCR primers**

|                |     |                          |
|----------------|-----|--------------------------|
| <i>SIAMESE</i> | Fw  | CACAAGATTCCTCCCACCACAG   |
|                | Rev | CAGAGGAGAAGAACCGCTCGAT   |
| <i>SMR1</i>    | Fw  | CACCCACATCCCAAGAACAAG    |
|                | Rev | GACGGAGGAGAAGAAACGGTCAA  |
| <i>SMR2</i>    | Fw  | AGAGCAGAAACCCAGAAGCCAAG  |
|                | Rev | GAAATCTCACGCGGTCGTTTCTT  |
| <i>SMR3</i>    | Fw  | CGATCACAAGATTCCGGAGGTG   |
|                | Rev | CGGCTCAGATCAATCGGTATGC   |
| <i>SMR4</i>    | Fw  | GCCGAGAAGCACGATGTATAG    |
|                | Rev | AGATCTGGTGGCTGAAAGTACC   |
| <i>SMR5</i>    | Fw  | AAACTACGACGACGGAGATACG   |
|                | Rev | GCTACCACCGAGAAGAACAAGT   |
| <i>SMR6</i>    | Fw  | GGGCTTCGTTGAAACCAGTCAAG  |
|                | Rev | TTTCTCGGTGCTGGTGGACATTC  |
| <i>SMR7</i>    | Fw  | GCCAAAACATCGATTCCGGGCTTC |
|                | Rev | TCGCCGTGGGAGTGATACAAAT   |
| <i>SMR8</i>    | Fw  | TAACCTATCTCCCGGCGTCACA   |
|                | Rev | GCACTTCAACGACGGTTTACGC   |
| <i>SMR9</i>    | Fw  | GCCACTTCAAGAACCCATCTCC   |
|                | Rev | TCCGGAGTACAACATCCACTCTCT |
| <i>SMR10</i>   | Fw  | GCAAAGAAGGAGCAACCGTCAAG  |
|                | Rev | CGGTGGACAAATTCTTGGCATCG  |
| <i>SMR11</i>   | Fw  | CTGCTTCGATCTCGGATTGTGTT  |
|                | Rev | GACGAAGGAGGCGGTGTTTTAC   |
| <i>SMR12</i>   | Fw  | GGTATGTTCGGAGACGAGCTTGA  |
|                | Rev | GAGTCGGTGTCTTGAACCCATCA  |
| <i>SMR13</i>   | Fw  | GAACCACCAACACCGACAACAAG  |
|                | Rev | GTTCGAGTTTCTCGGCGTCTCT   |
| <i>Actin2</i>  | Fw  | GGCTCCTCTTAACCCAAAGGC    |
|                | Rev | CACACCATCACCAGAATCCAGC   |
| <i>EMB2386</i> | Fw  | CTCTCGTTCCAGAGCTCGCAAAA  |
|                | Rev | AAGAACACGCATCCTACGCATCC  |
| <i>PAC1</i>    | Fw  | TCTCTTTGCAGGATGGGACAAGC  |
|                | Rev | AGACTGAGCCGCCTGATTGTTTG  |
| <i>RPS26C</i>  | Fw  | GACTTTCAAGCGCAGGAATGGTG  |
|                | Rev | CCTTGTCCTTGGGGCAACACTTT  |

**Primers used for ChIP experiments**

|              |                             |
|--------------|-----------------------------|
| SMR5-ChIP-F1 | GGAACAAAGTCATGAGAATTAACGC   |
| SMR5-ChIP-R1 | TTCCTGCTAAAGGACGTGGTG       |
| SMR5-ChIP-F2 | GTTGTCAACAATCCTACAATTGTGTG  |
| SMR5-ChIP-R2 | GATGTCGAATCCATTTGGTACTATG   |
| SMR5-ChIP-F3 | ATCACAACGAAACGAACCTTAGAAC   |
| SMR5-ChIP-R3 | TGGGTTTCTATATATTATGCGAGCTC  |
| SMR5-ChIP-F4 | ACGTGGCAGTACGTTCCCTCC       |
| SMR5-ChIP-R4 | GTCCGCTCTCTCGCACTTTC        |
| SMR7-ChIP-F1 | ATCACCAGAAGCAGTCAGAAGAC     |
| SMR7-ChIP-R1 | ACATTTCTTGGATCAAGGTGTG      |
| SMR7-ChIP-F2 | TAAACCTAAATCACAAACGACCA     |
| SMR7-ChIP-R2 | GTTCTGTTGATTACTCAATGTAGCTAG |
| SMR7-ChIP-F3 | GGTGTGGTCTCTCATTGACGC       |
| SMR7-ChIP-R3 | GGCCATCATATATGGGCCTTAC      |
| SMR7-ChIP-F4 | TAGTCTCAAACCATGGCGC         |
| SMR7-ChIP-R4 | GAAGCTTTCAGAGGAAGATTATTAGG  |
